# Supplementary material for: Vascular comorbidities worsen prognosis of patients with heart failure hospitalised with COVID-19
Source: HighWire-hosted journal article supplement (doi:10.1136/openhrt-2021-001668), 2021-06-01
Supplement: openhrt-2021-001668supp003_data_supplement.pdf [file openhrt-2021-001668supp003_data_supplement.pdf]

**Supplemental table 5. ARDS and intubation data on patients with HF hospitalized with COVID-19**

| ARDS Stages | ARDS (n, %) | ARDS mortality (n, %) | ICU (n, %) | ICU mortality (n, %) | Intubated (n, %) | Intubated mortality (n, %) |
|-------------|-------------|-----------------------|------------|----------------------|------------------|----------------------------|
| 0           | 153 (73%)   | 7 (16.3%)             | 12 (23%)   | 10 (20%)             | 6 (24%)          | 2 (12.5%)                  |
| 1           | 6 (3%)      | 1 (2.3%)              | 1 (2%)     | 1 (2%)               | 0 (0%)           | 0 (0%)                     |
| 2           | 9 (4%)      | 0 (0%)                | 0 (0%)     | 2 (4%)               | 2 (8%)           | 0 (0%)                     |
| 3           | 43 (20%)    | 35 (81.4%)            | 45 (85%)   | 37 (74%)             | 17 (68%)         | 14 (87.5%)                 |
| ARDS+       | 58 (27%)    | 36 (83.7%)            | 46 (87%)   | 40 (80%)             | 19 (76%)         | 14 (87.5%)                 |

ARDS, acute respiratory distress syndrome; ARDS+, all stages from 1 to 3; ARDS mortality, patients with ARDS that had in-hospital death; Intubated mortality, intubated patients who had in-hospital death; ICU, patients admitted to the intensive care unit; ICU mortality, ICU patients who had in-hospital death
