# Supplementary material for: Vascular comorbidities worsen prognosis of patients with heart failure hospitalised with COVID-19
Source: HighWire-hosted journal article supplement (doi:10.1136/openhrt-2021-001668), 2021-06-01
Supplement: openhrt-2021-001668supp005_data_supplement.pdf [file openhrt-2021-001668supp005_data_supplement.pdf]

**Supplemental Table 4. Multivariate analysis of variables associated with LOS**

|            | <b>Coefficient</b> | <b>95% CI</b>  | <b>p-value</b> |
|------------|--------------------|----------------|----------------|
| PAD        | 0.15               | (0.03, 0.26)   | 0.0123         |
| Asthma     | 0.35               | (0.24, 0.47)   | <0.0001        |
| Stroke     | 0.38               | (0.29, 0.47)   | <0.0001        |
| IVDU       | 0.63               | (0.5, 0.75)    | <0.0001        |
| Gender (m) | -0.15              | (-0.23, -0.06) | 0.0007         |

Risk factors with p-value less than 0.2 were selected as the univariate predictors of LOS. Multivariable linear regression was performed for the respective p-values to determine how coexistence of PAD, asthma, stroke, IVDU, and gender affected LOS.

IVDU, intravenous drug use; PAD, peripheral arterial disease;
